# Supplementary material for: Arsenic Exposure Causes Global Changes in the Metalloproteome of Escherichia coli
Source: MDPI journal article supplement (doi:10.3390/microorganisms11020382), 2023-02-02
Supplement: s1 [file s1]

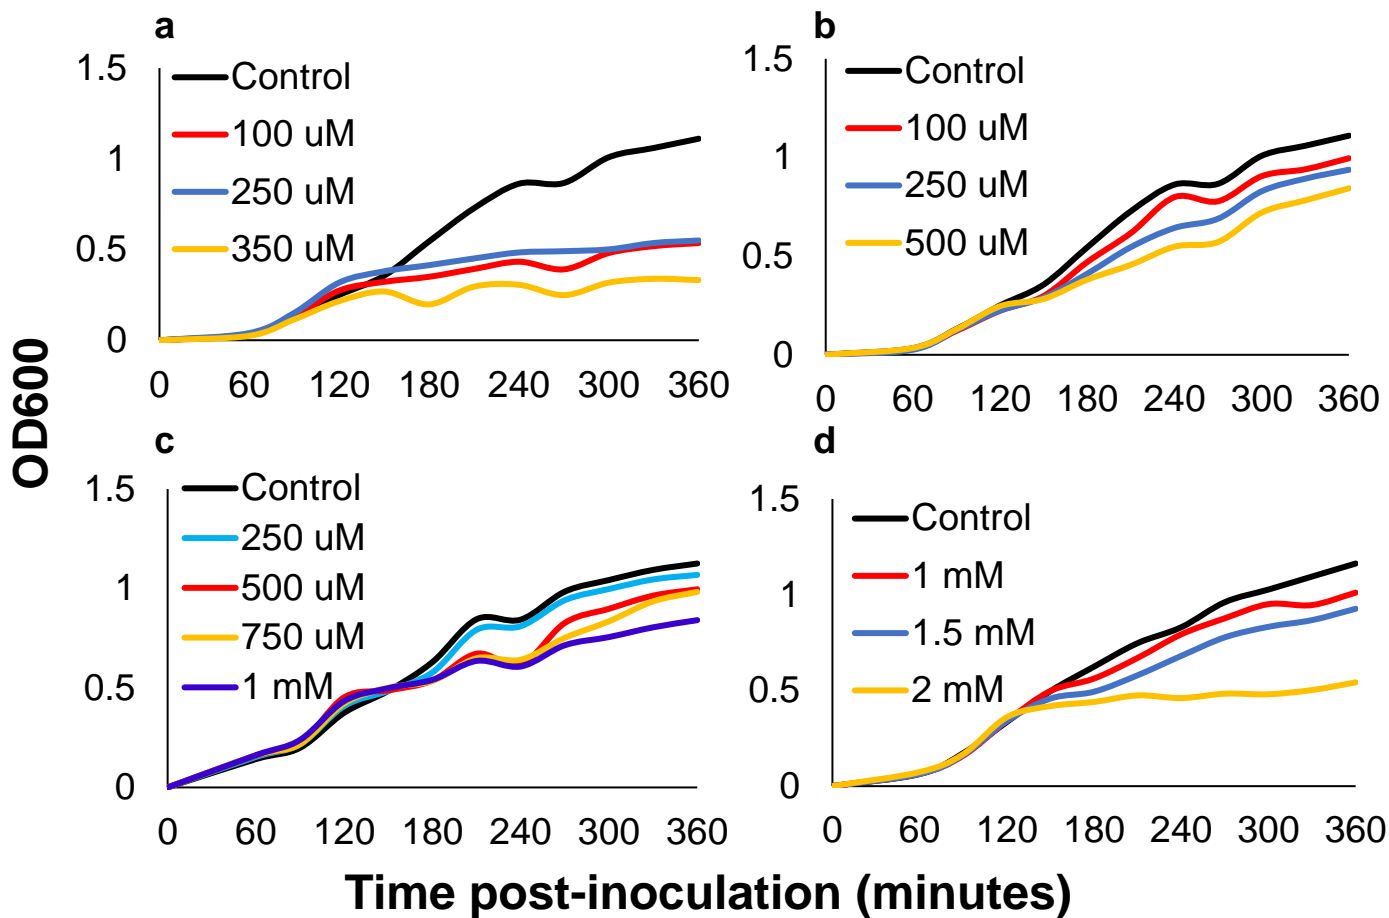

**Supplemental Figure S1: Representative growth curves.** AW3110 (a and b) and K-12 (c and d) were cultured with increasing concentrations of  $\text{As}^{\text{III}}$  (a and c) or  $\text{As}^{\text{V}}$  (b and d). Arsenic was added 120 minutes post-inoculation.

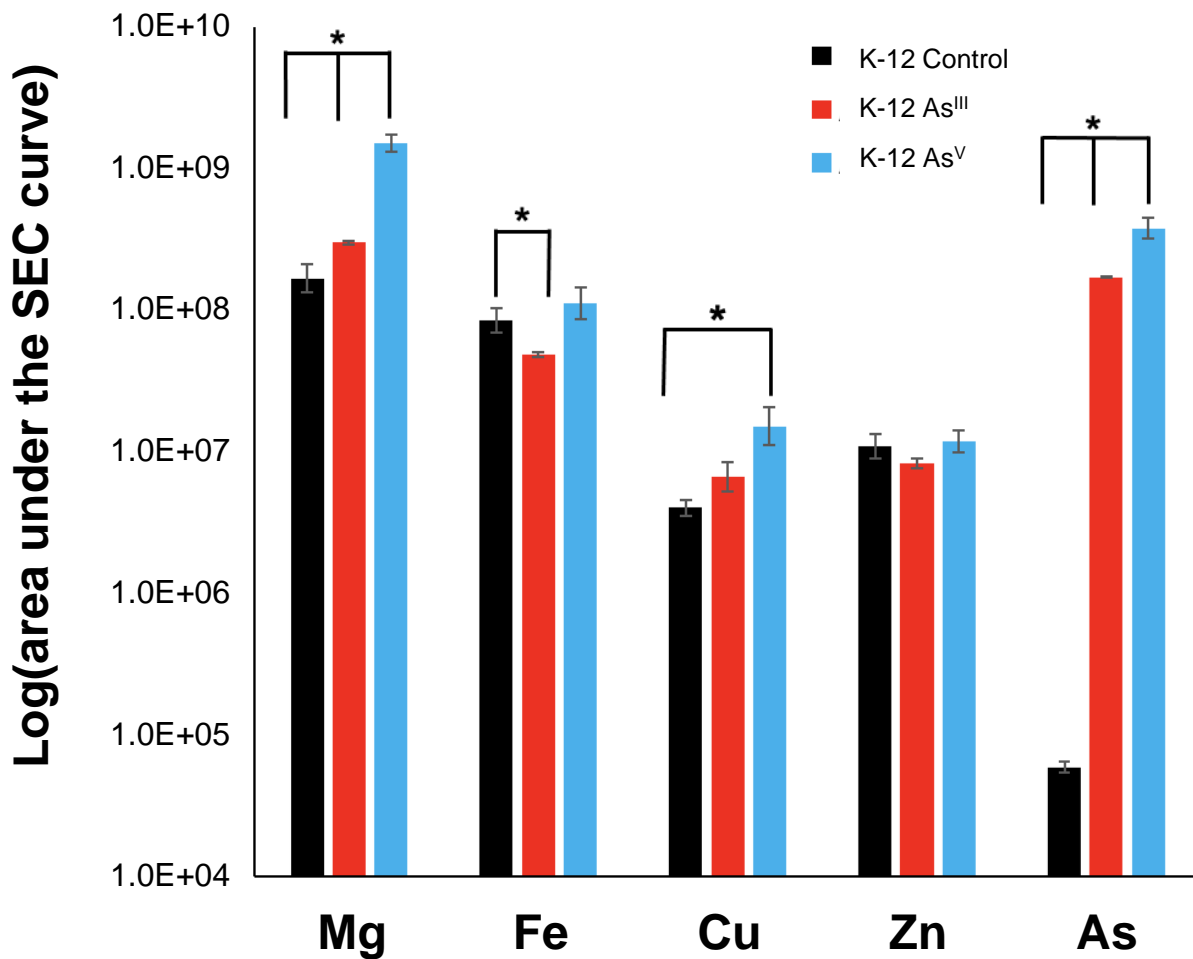

**Supplemental Figure S2: K-12 SEC-ICPMS metal profile integrations.**

The area under the curve for metal profiles for protein-bound copper, magnesium, arsenic, iron, and zinc from SEC-ICP-MS analysis. As<sup>V</sup> treatment is in cyan, As<sup>III</sup> treatment is in red, and control is in black. Error bars are +/- 1 standard deviation. \* indicates significant differences ( $p < 0.05$ ) determined by student's *T*-test.

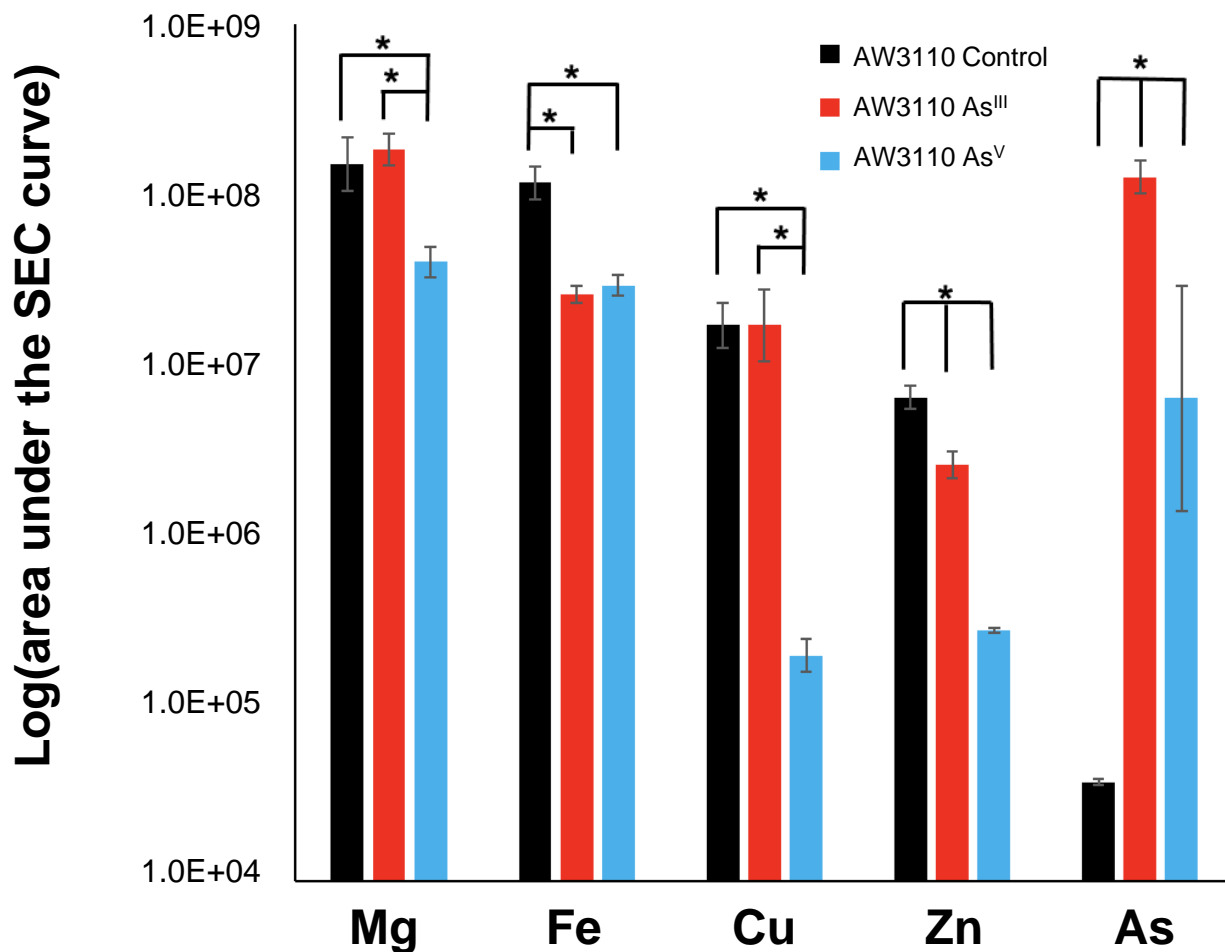

**Supplemental Figure S3: AW3110 SEC-ICPMS metal profile integrations.**

The area under the metalloprotein profile curves for copper, magnesium, arsenic, iron, and zinc from SEC-ICP-MS analysis. As<sup>V</sup> treatment is in cyan, As<sup>III</sup> treatment is in red, and control is in black. Error bars are +/- 1 standard deviation. \* indicates significant differences ( $p < 0.05$ ) determined by student's *T*-test.

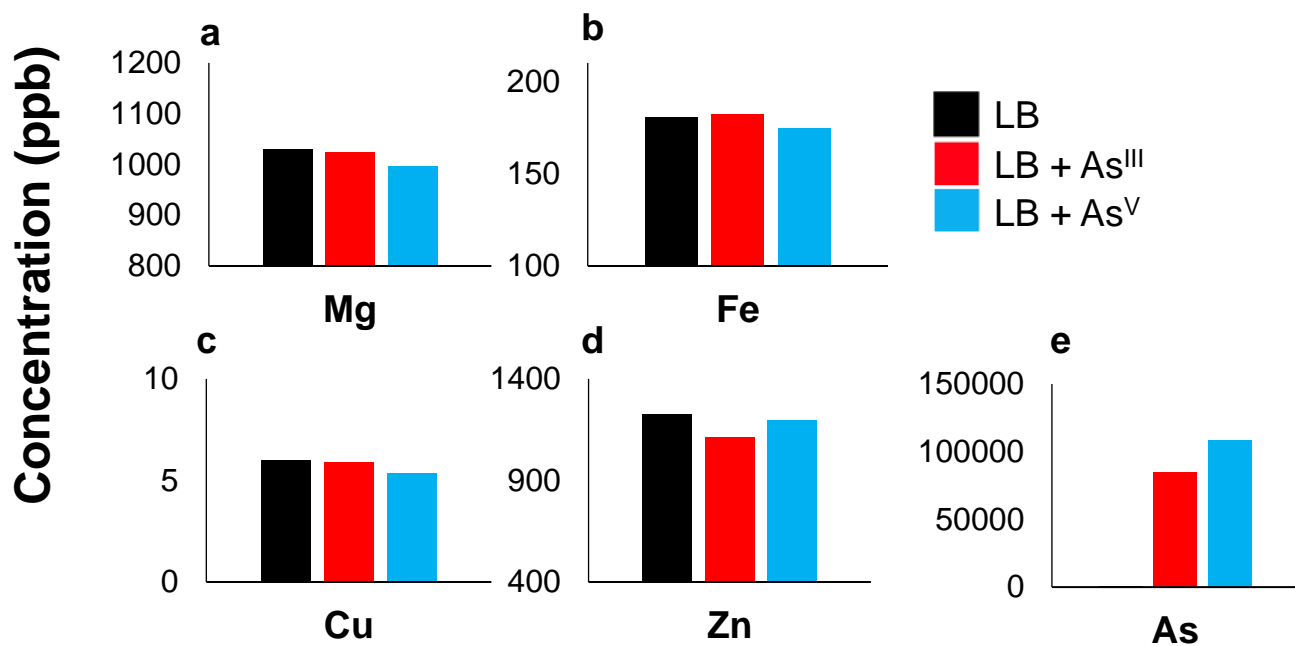

**Supplemental Figure S4: Metal concentration in media.** LB media without arsenic supplementation (black), with As<sup>III</sup> (red), and with As<sup>V</sup> (cyan) was analyzed via ICP-MS for Mg (a), Fe (b), Cu (c), Zn (d), and As (e).

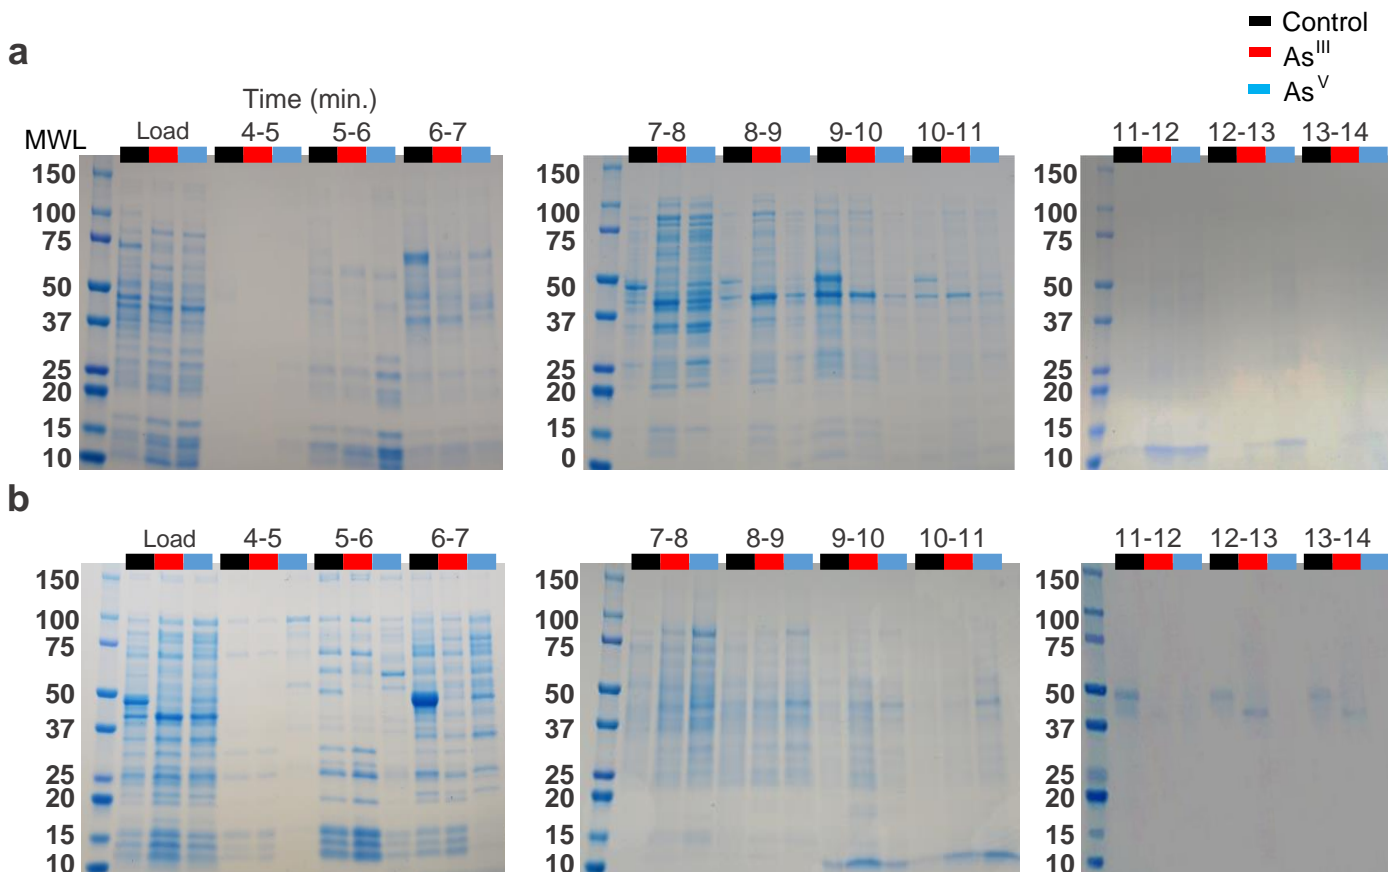

**Supplemental Figure S5: SDS-PAGE analysis of SEC fractionations.**

Fractions for K-12 (a) and AW3110 (b) were collected during SEC-UV analysis and analyzed by SDS-PAGE. 1-min Fractions began at minute 4 post-injection (fraction 1) and ended at minute 15 (fraction 10).
